# Supplementary material for: IL-13RA2 downregulation in fibroblasts promotes keloid fibrosis via JAK/STAT6 activation
Source: PubMed Central journal article supplement (PMC10070111; doi:10.1172/jci.insight.157091), 2023-03-22
Supplement: jciinsight-8-157091-s062.pdf [file jciinsight-8-157091-s062.pdf]

1 **Supplementary Information**

2 **Supplementary Fig. 1–9**

3 **Table S1. Clinical characteristics of keloid patients.**

4 **Table S2. List of reagents.**

5 **Table S3. List of mRNA primer sequences used in this study.**

6 **Table S4. List of si-IL13RA2 sequences.**

7 **Supplementary Figure Legend**

8 **Supplementary Figure 1. Masson staining of normal skin and keloid. Scale bar, 100µm.**

9 **Supplementary Figure 2. Concentration of IL13 of indicated co-cultured system.**

10 **Supplementary Figure 3. Cell cycle assay by PI staining after IL13RA2 overexpression**  
11 **in KF.**

12 **Supplementary Figure 4. Western blotting of NFb-NC, NFb-si-1 and NFb-si-3.**

13 **Supplementary Figure 5. Western blotting of KF treated with indicated concentration of**  
14 **AS1517499.**

15 **Supplementary Figure 6. Concentration of IL13 of co-cultured system that KFs were pre-**  
16 **treated with or without 800nM AS1517499.**

17 **Supplementary Figure 7. IHC staining of IL13RA2 of patient biopsy that used for animal**  
18 **model. Scale bar, 100µm.**

19 **Supplementary Figure 8. TUNEL staining of Day0 implantations in papillary and reticular**  
20 **dermis(n=2). Scale bar, 100µm.**

21 **Supplementary Figure 9. Bubble plots of GO and KEGG pathway enrichment for down-**  
22 **regulated genes.**

23

24

**Supplementary Table 1**

| <b>Sex</b> | <b>Age</b> | <b>Diagnosis</b>                                            | <b>Primary fibroblast</b> |
|------------|------------|-------------------------------------------------------------|---------------------------|
| Male       | 43y        | Scar contracture skin graft (clavicular epithelial removal) | NFb                       |
| Male       | 26y        | Precordial keloid                                           | 03KF                      |
| Female     | 38y        | Precordial keloid                                           | 04KF                      |
| Male       | 38y        | Precordial keloid                                           | 05KF                      |
| Female     | 54y        | Umbilical keloid                                            |                           |
| Female     | 25y        | Precordial keloid                                           | 07KF                      |
| Female     | 1y         | Polydactyly                                                 | 08NF                      |

|        |     |                                            |                                     |
|--------|-----|--------------------------------------------|-------------------------------------|
| Female | 36y | Mammary hypertrophy                        | 10NF                                |
| Female | 25y | Earlobe keloid                             | 11KF                                |
| Female | 53y | Precordial keloid                          | 12KF                                |
| Female | 24y | Earlobe keloid                             | 13KF                                |
| Female | 28y | Earlobe keloid                             | 14KF                                |
| Female | 19y | Scapula keloid(multiple)                   | 15KF                                |
| Female | 1y  | Polydactyly                                | 16NF                                |
| Female | 29y | Precordial keloid                          | 17KF                                |
| Female | 37y | Precordial keloid                          | 18KF                                |
| Male   | 27y | Precordial keloid                          |                                     |
| Male   | 46y | Precordial keloid                          | 19KF                                |
| Female | 52y | Lateral chest wall keloid                  | 20KF                                |
| Female | 19y | Precordial keloid                          |                                     |
| Female | 32y | Precordial keloid                          |                                     |
| Female | 51y | Precordial keloid                          | 23KF                                |
| Female | 33y | Precordial keloid                          | 24KF                                |
| Male   | 23y | Dorsum keloid (multiple,<br>recrudescence) | 27KF                                |
| Male   | 35y | Precordial keloid                          | 28KF                                |
| Female | 33y | Precordial keloid                          | 29KF                                |
| Female | 43y | Scar contracture (abdominal skin<br>graft) | NF1                                 |
| Female | 42y | Plantar melanoma (abdominal skin<br>graft) | NF2                                 |
| Male   | 40y | Occiput lipoma                             | NF3                                 |
| Male   | 43y | Precordial keloid                          | Balb/C keloid<br>implantation model |

25

26

**Supplementary Table 2**

| Product          | Cat#    | Company                   |
|------------------|---------|---------------------------|
| Ki67 antibody    | ab15580 | Abcam                     |
| CD31 antibody    | 77699   | Cell Signaling Technology |
| CD68 antibody    | 76437   | Cell Signaling Technology |
| CD163 antibody   | 93498   | Cell Signaling Technology |
| IL13RA2 antibody | 85677   | Cell Signaling Technology |
| FN1 antibody     | 610077  | BD Bioscience             |
| COL1A1 antibody  | 72026   | Cell Signaling Technology |
| COL3A1 antibody  | 66887   | Cell Signaling Technology |

---

|                                                |                        |                           |
|------------------------------------------------|------------------------|---------------------------|
| pSTAT6 antibody                                | 6391(Western blotting) | Cell Signaling Technology |
|                                                | Ab263947 (IHC)         | Abcam                     |
| STAT6 antibody                                 | 5397                   | Cell Signaling Technology |
| MMP9 antibody                                  | 1379008                | Affinity                  |
| MMP2 antibody                                  | 40994                  | Cell Signaling Technology |
| a-Tubulin antibody                             | 3873                   | Cell Signaling Technology |
| vimentin antibody                              | 5741                   | Cell Signaling Technology |
| a-SMA antibody                                 | ab124964               | Abcam                     |
| GAPDH antibody                                 | 100080                 | Proteintech               |
| BCL2L1 antibody                                | 2764                   | Cell Signaling Technology |
| BCL2 antibody                                  | 15071                  | Cell Signaling Technology |
| Goat Anti-Rabbit IgG H&L (Alexa<br>Fluor® 594) | ab150080               | Abcam                     |
| DAPI                                           | 62247                  | ThermoFisher              |
| AS1517499                                      | S8685                  | Selleck                   |
| IL13                                           | 10369-HNAC             | Sino Biological           |
| INTERFERin                                     | 409-10                 | Polyplus                  |
| CCK8                                           | EZB-CK8                | EZBioscience              |
| Annexin V-APC/7-AAD Apoptosis<br>Detection Kit | KGA1023                | KeyGEN                    |
| TUNEL staining kit                             | E-CK-A320              | Elabscience               |
| Masson staining kit                            | G1006                  | Servicebio                |
| RNALater                                       | AM7024                 | ThermoFisher              |
| Tissue RNA Extraction Kit                      | EZB-RN001-plus         | EZBioscience              |
| Express RNA Extraction Kit                     | B0004DP                | EZBioscience              |
| Color Reverse Transcriptase Kit                | A0010CGQ               | EZBioscience              |
| 2 color X SYBR Green qPCR Mix                  | A0012-R2               | EZBioscience              |
| RIPA                                           | P0013B                 | Beyotime Biotechnology    |
| Protease inhibitor                             | 05056489001            | Roche                     |

---

|                                   |             |               |
|-----------------------------------|-------------|---------------|
| phosphatase inhibitors            | 04906837001 | Roche         |
| Pierce™ BCA Protein Assay Kit     | 23227       | ThermoFisher  |
| 5×SDS-PAGE Protein Loading Buffer | 20315ES05   | Yeasen        |
| collagenase I                     | MB2686      | Meilunbio     |
| PMA                               | P8139       | Sigma Aldrich |

27  
28

**Supplementary Table 3**

| Primer Name     | Primer Sequence         |
|-----------------|-------------------------|
| GAPDH-Forward   | GTCTCCTCTGACTTCAACAGCG  |
| GAPDH-Reverse   | ACCACCCTGTTGCTGTAGCCAA  |
| IL4R-Forward    | CTGCTCATGGATGACGTGGTCA  |
| IL4R-Reverse    | GGTGTGAACTGTCAGGTTTCCTG |
| IL13RA1-Forward | CCTGAATGAGAGGATTTGTCTGC |
| IL13RA1-Reverse | CAGTCACAGCAGACTCAGGATC  |
| IL13RA2-Forward | GTGGAGTGATAAACAATGCTGGG |
| IL13RA2-Reverse | TGGGTAGGTGTTTGGCTTACGC  |
| IL-4-Forward    | CCGTAACAGACATCTTTGCTGCC |
| IL-4-Reverse    | GAGTGCCTTCTCATGGTGGCT   |
| IL-13-Forward   | ACGGTCATTGCTCTCACTTGCC  |
| IL-13-Reverse   | CTGTCAGGTTGATGCTCCATACC |
| SOCS1-Forward   | TTCGCCCTTAGCGTGAAGATGG  |
| SOCS1-Reversed  | TAGTGCTCCAGCAGCTCGAAGA  |
| SOCS3-Forward   | CATCTCTGTCGGAAGACCGTCA  |
| SOCS3-Reversed  | GCATCGTACTGGTCCAGGAACT  |
| MMP9-Forward    | GCCACTACTGTGCCTTTGAGTC  |
| MMP9-Reversed   | CCCTCAGAGAATCGCCAGTACT  |
| Arg-1-Forward   | TCATCTGGGTGGATGCTCACAC  |
| Arg-1-Reversed  | GAGAATCCTGGCACATCGGGAA  |

29  
30

**Supplementary Table 4**

| No. | Primer                     | Sequence(5'to3')       |
|-----|----------------------------|------------------------|
| 1   | IL13RA2 (human) siRNA-67   | GCAAUAUCAAGGUUUUAAATT  |
|     |                            | UUUAAAACCUUGAUUUGCTT   |
| 2   | IL13RA2 (human) siRNA- 225 | GGAUACUUAGGUUAUCUCUTT  |
|     |                            | AGAGAUAAACCUAAGUAUCCTT |
| 3   | IL13RA2 (human) siRNA- 394 | GCAUUGAAGCGAAGAUACATT  |
|     |                            | UGUAUCUUCGCUUCAUGCTT   |

31  
32  
33  
34



35

### Supplementary Figure 1

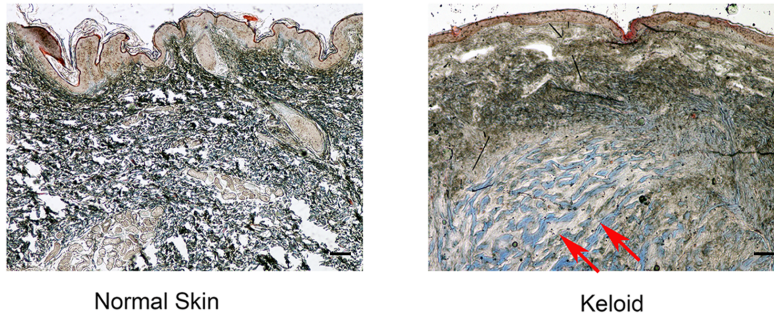

36

37

38

39

### Supplementary Figure 2

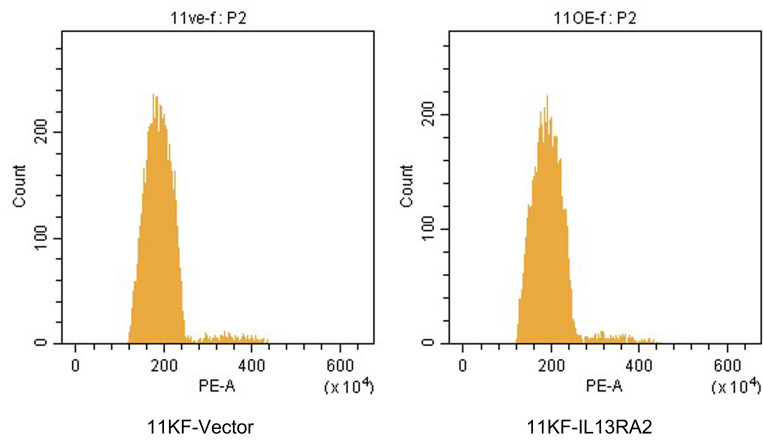

40

41

42

43

### Supplementary Figure 3

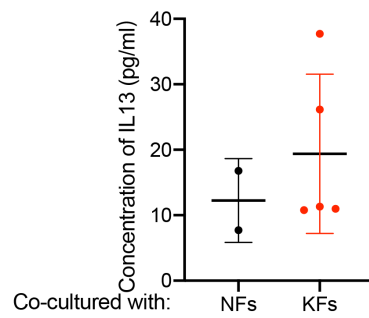

44

45

46

47

### Supplementary Figure 4

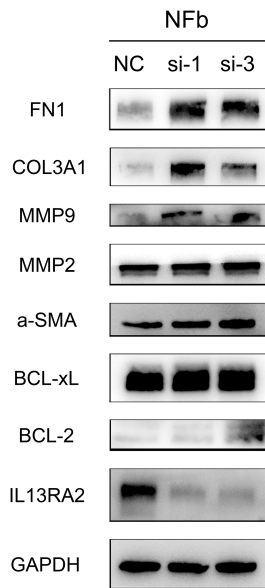

48  
49

**Supplementary Figure 5**

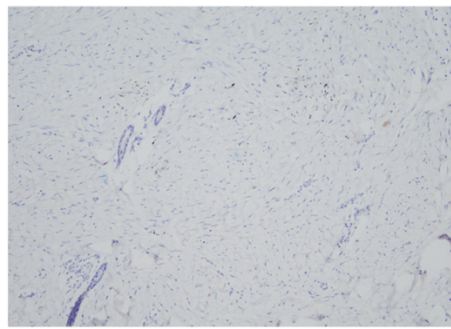

IL13RA2

50  
51  
52  
53

**Supplementary Figure 6**

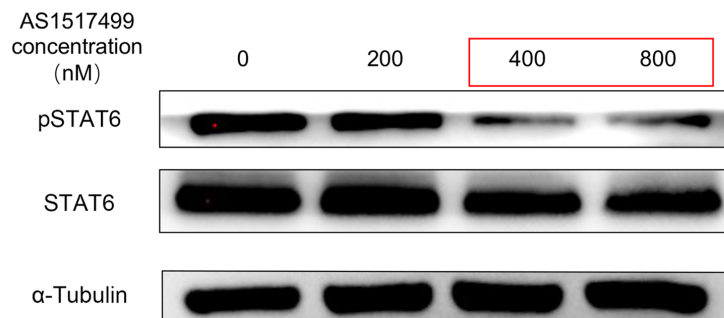

54  
55  
56  
57

**Supplementary Figure 7**

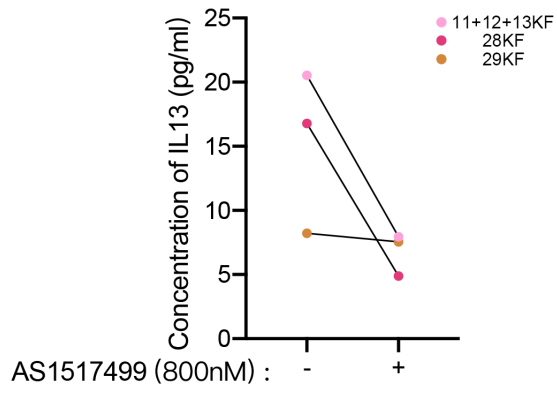

58  
59  
60  
61

Supplementary Figure 8

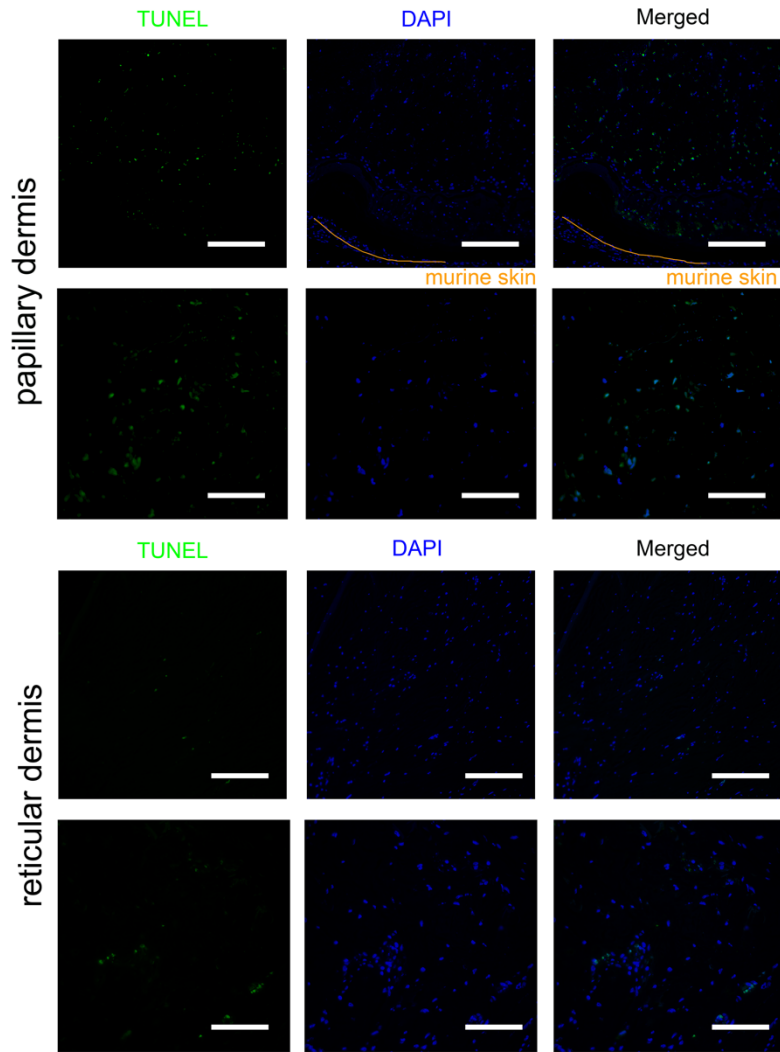

62  
63

Supplementary Figure 9



**IL13RA2 Downregulation in Fibroblast  
Promotes Keloid Fibrosis via JAK/STAT6  
Activation**

**Full uncut blots**

Antibodies have been mentioned in Supplementary Table.2 .

# Full unedited blots for figure 1E

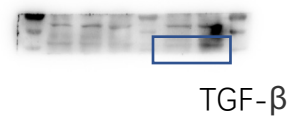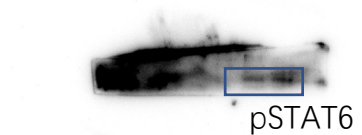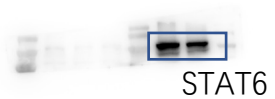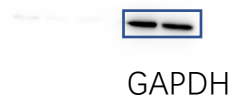

# Full unedited blots for figure 2A

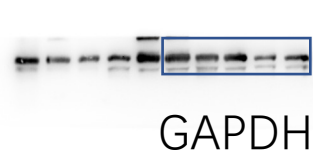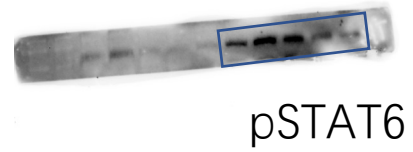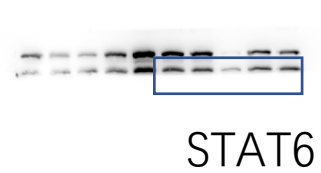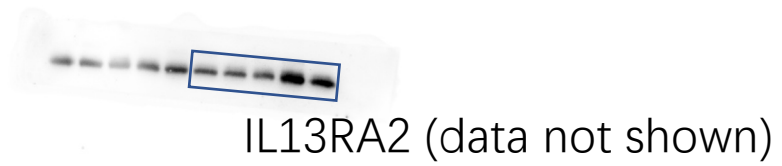

# Full unedited blots for figure 2E

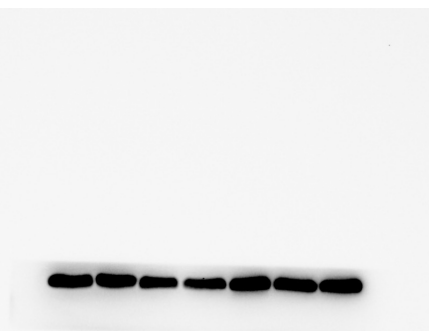

GAPDH

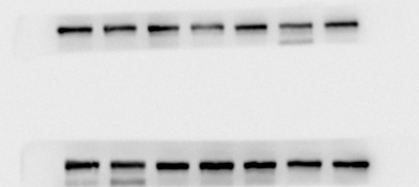

STAT6

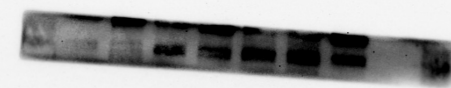

pSTAT6



# Full unedited blots for figure 3B

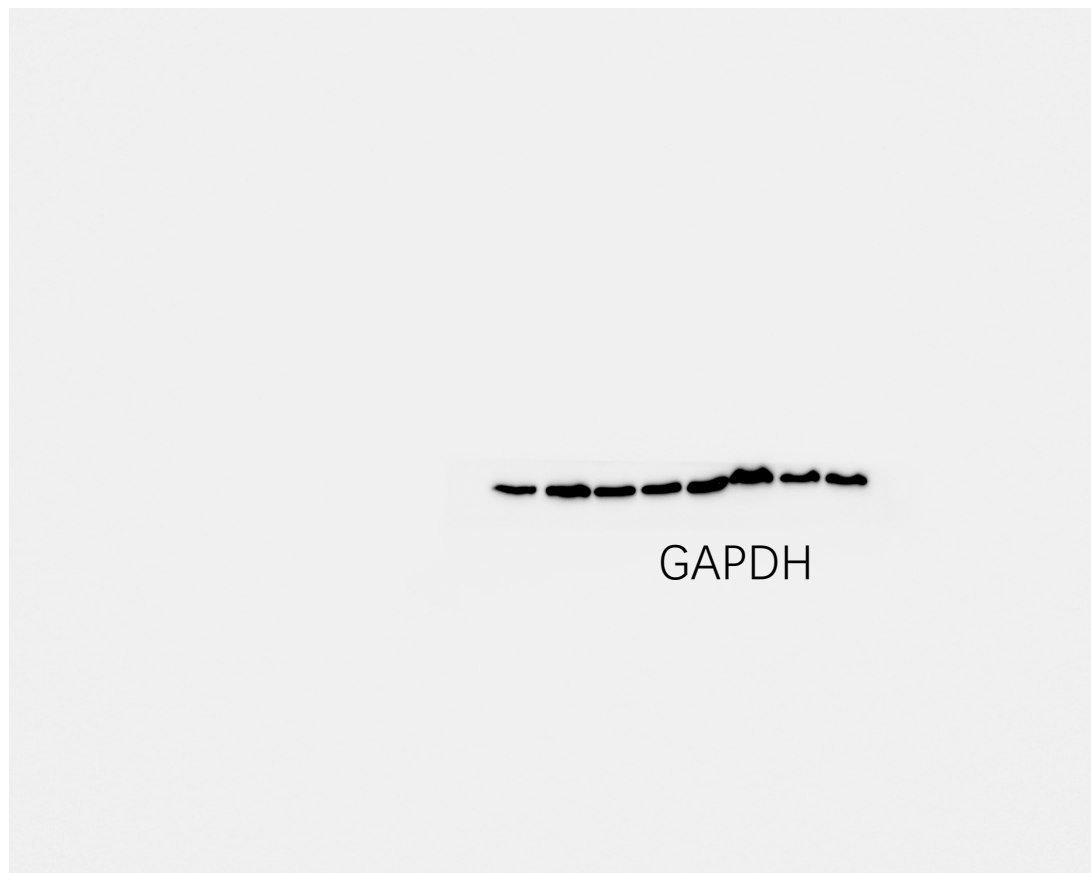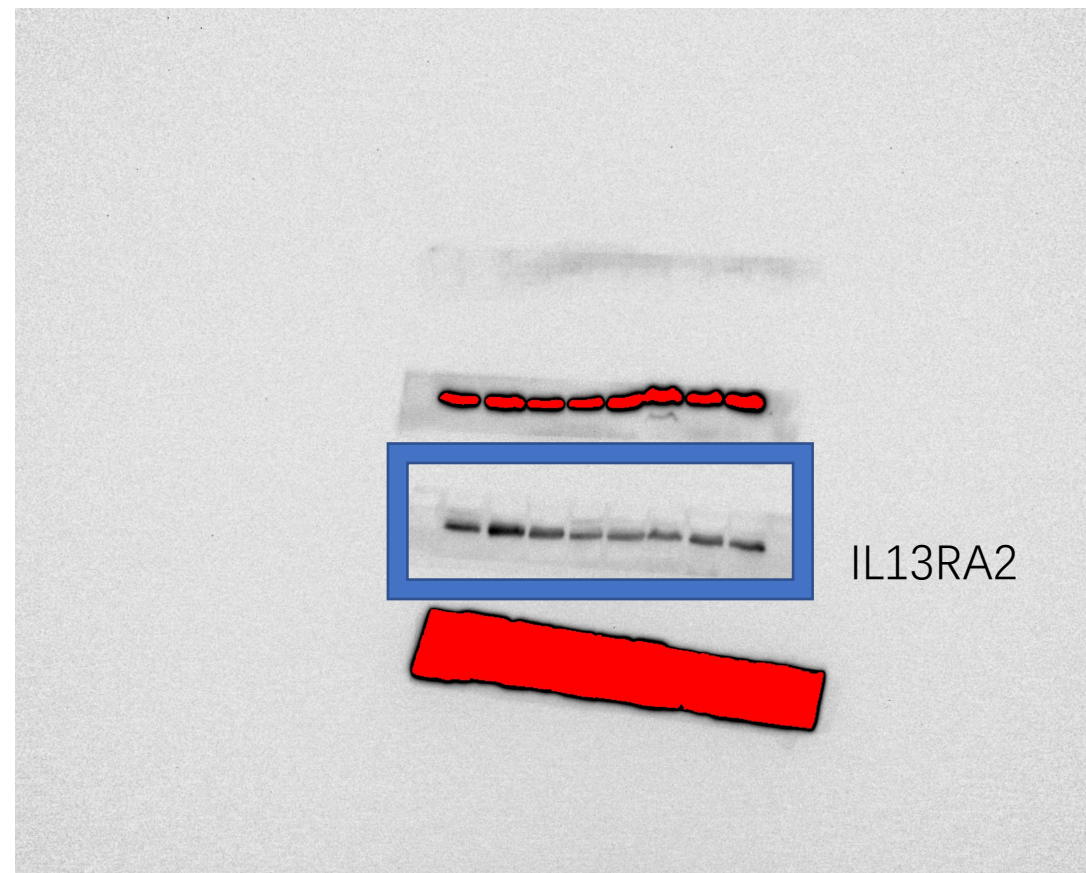

# Full unedited blots for figure 3E

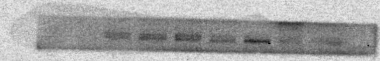

pSTAT6

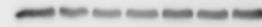

GAPDH

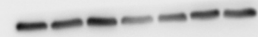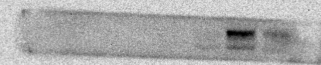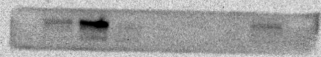

IL13RA2

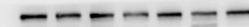

STAT6

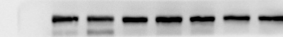

# Full unedited blots for figure 4C

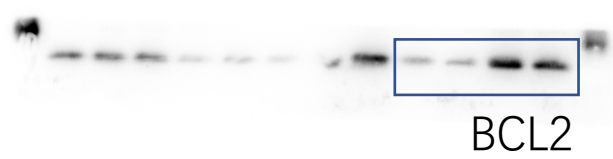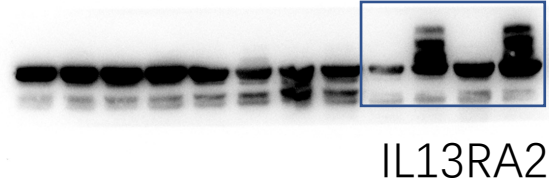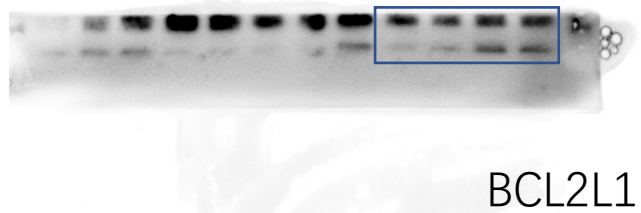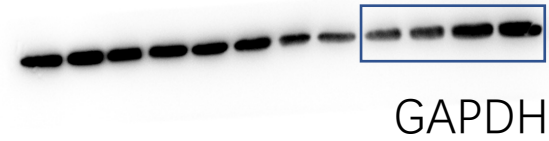

# Full unedited blots for figure 4D

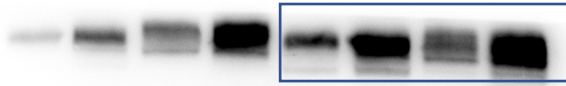

IL13RA2

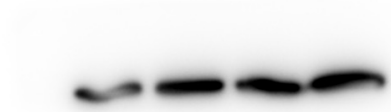

GAPDH

GAPDH of the same blot of IL13RA2

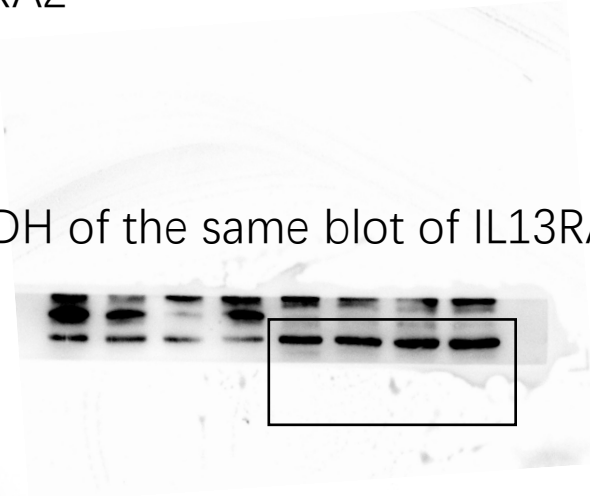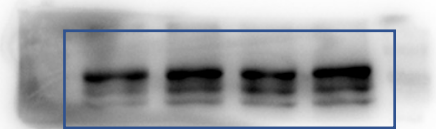

STAT6

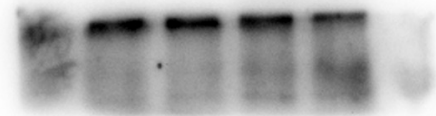

pSTAT6

# Full unedited blots for figure 5C (20KF)

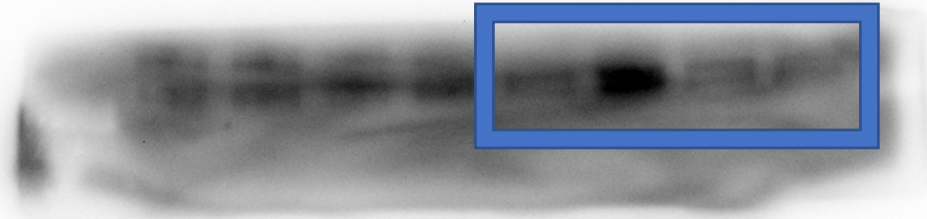

BCL2

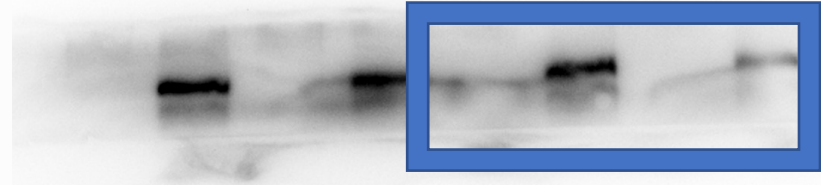

pSTAT6

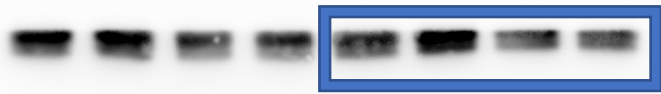

BCL2L1

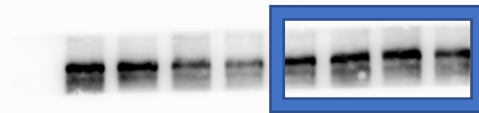

STAT6

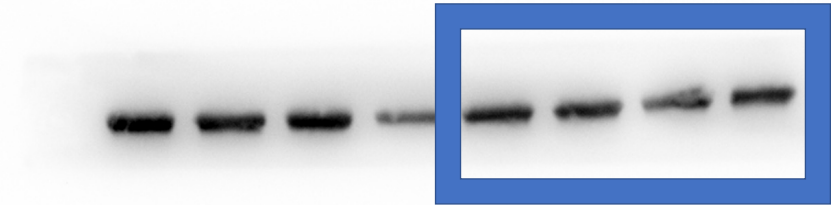

GAPDH

# Full unedited blots for figure 5C (28KF)

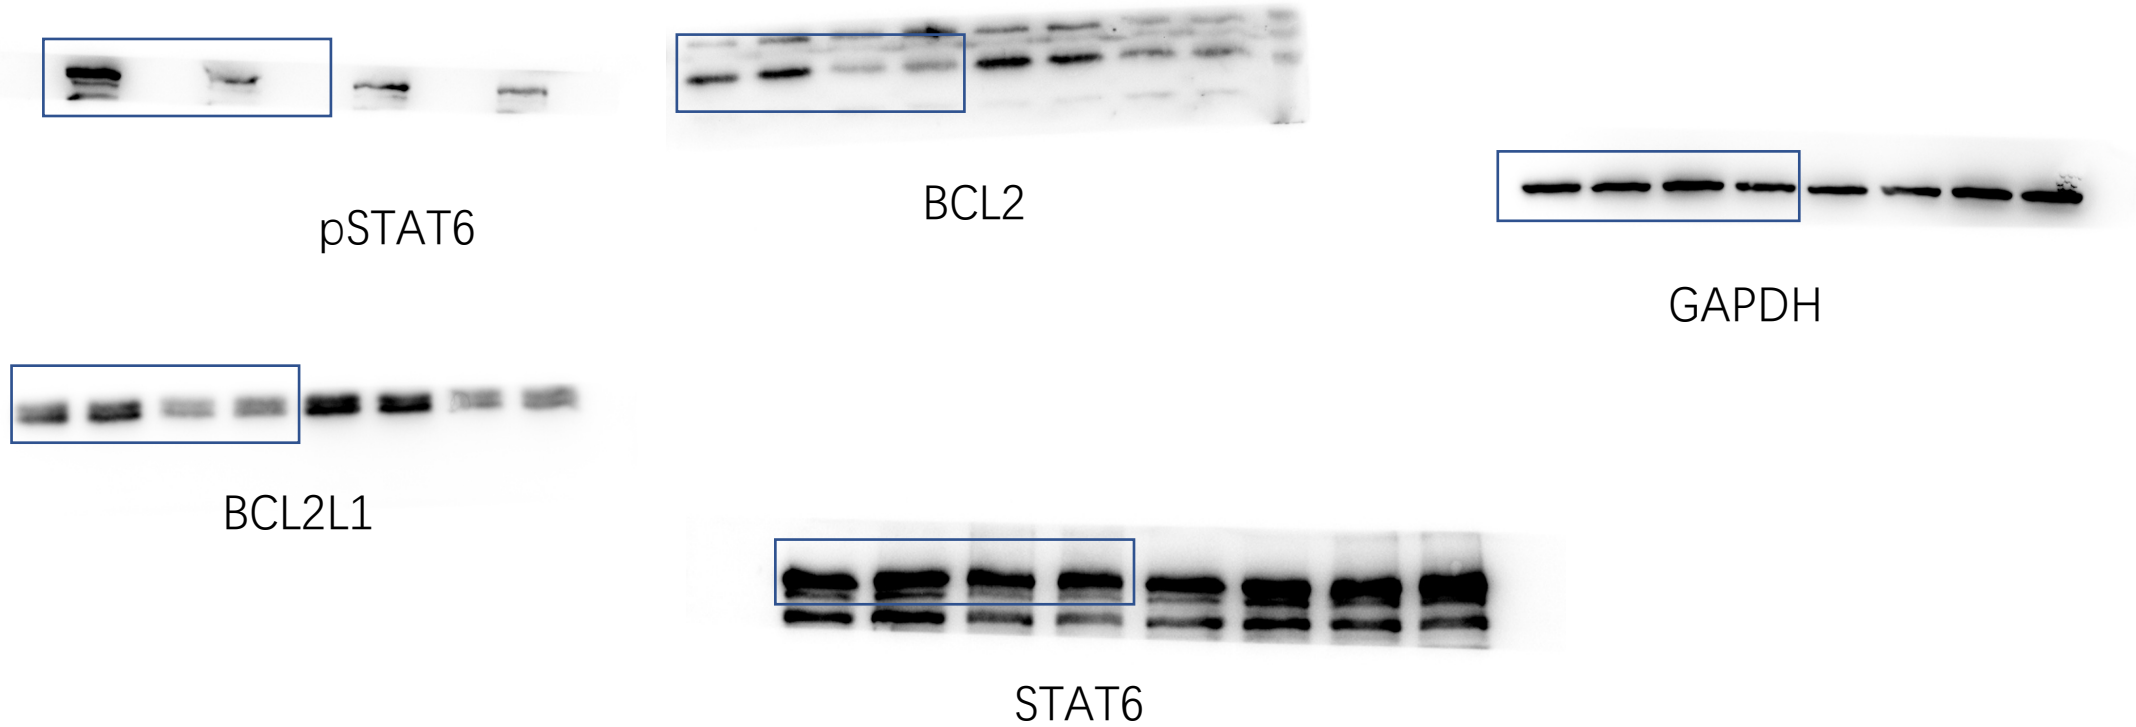



# Full unedited blots for figure 5F

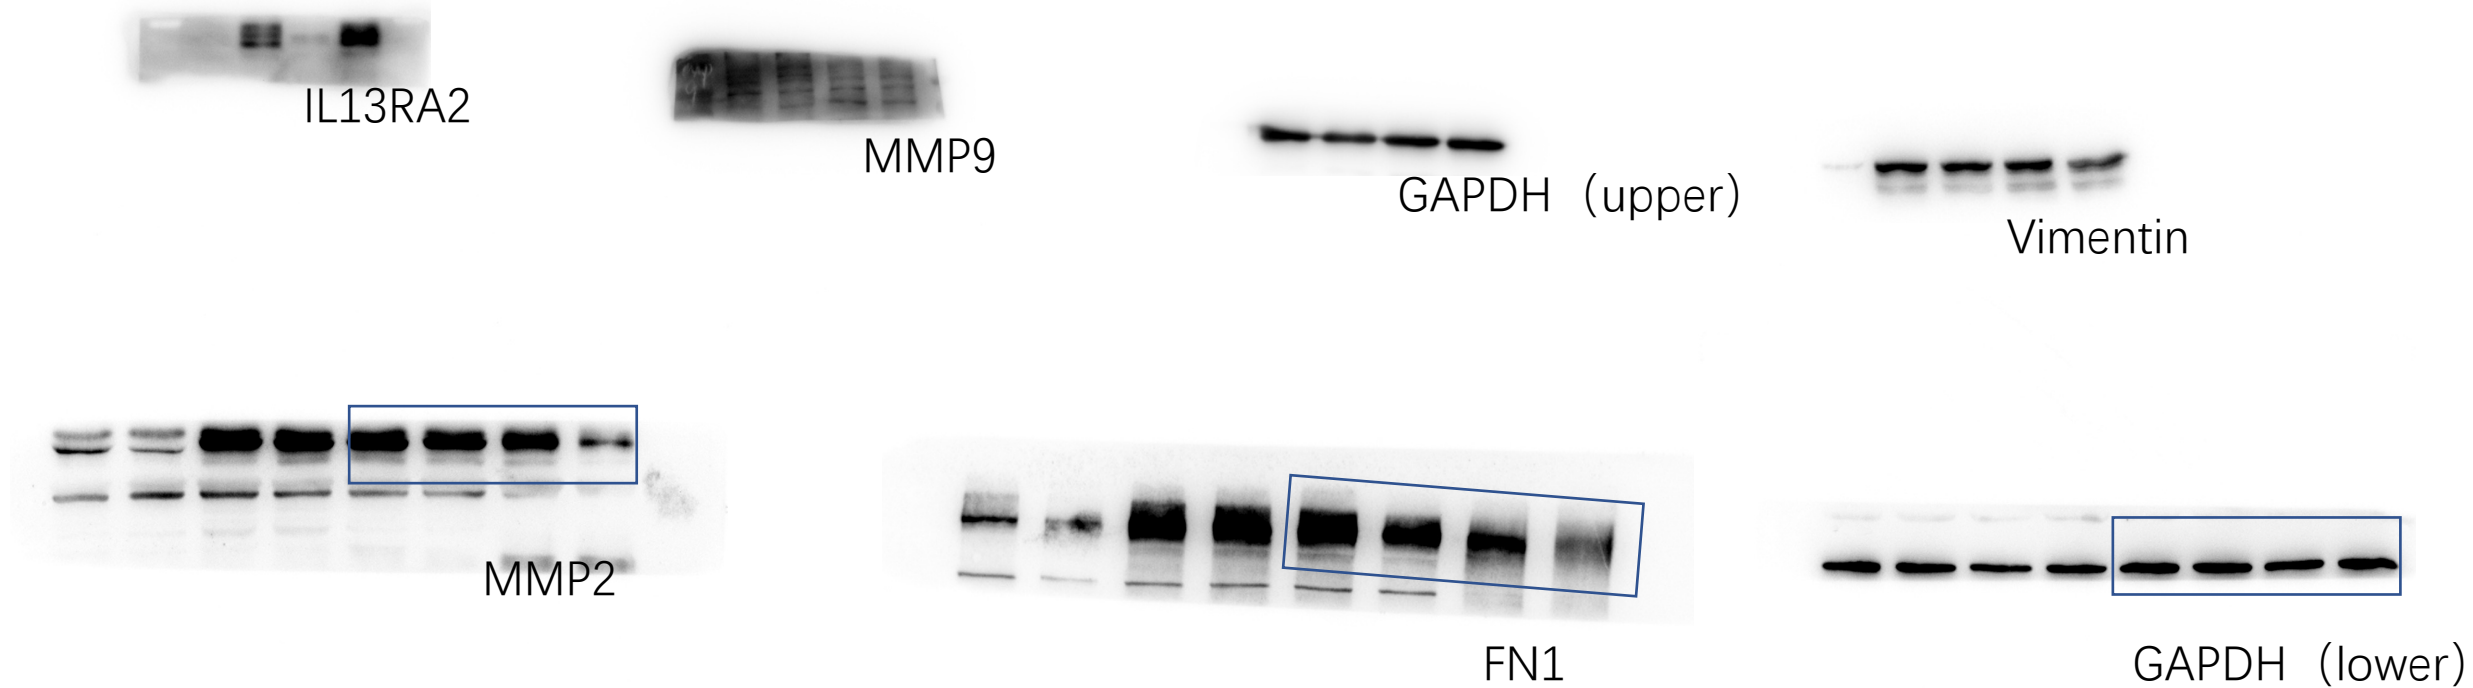

# Full unedited blots for figure 5G

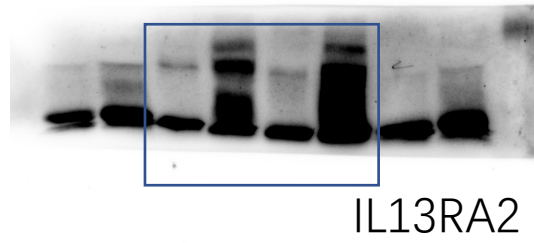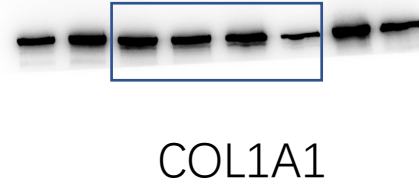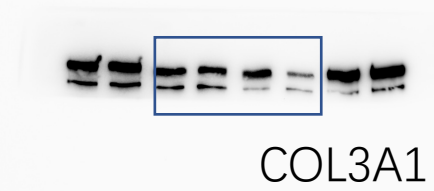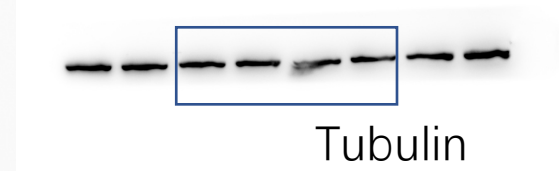



# Full unedited blots for figure 5H

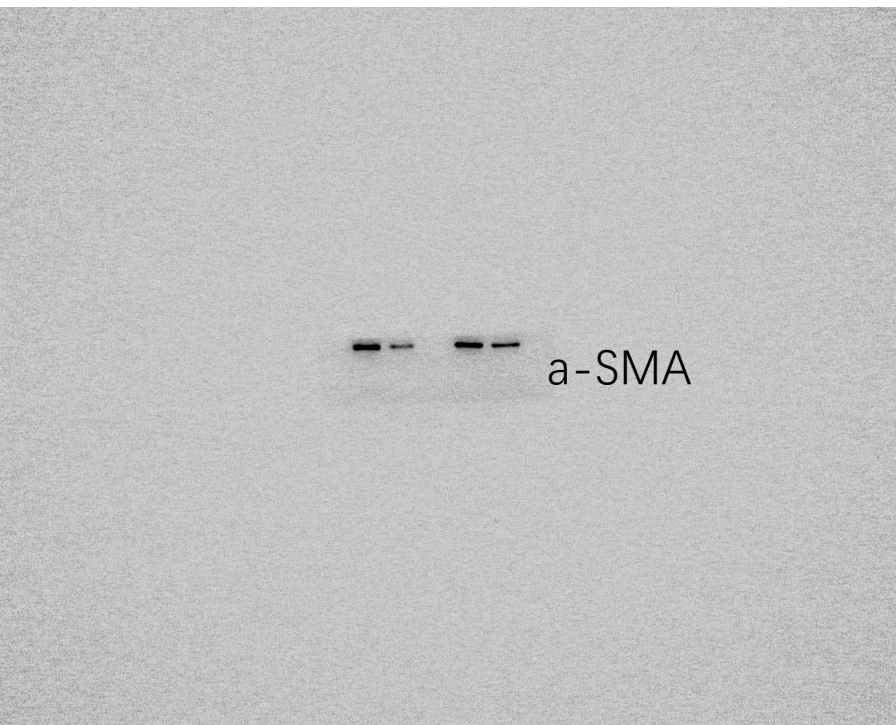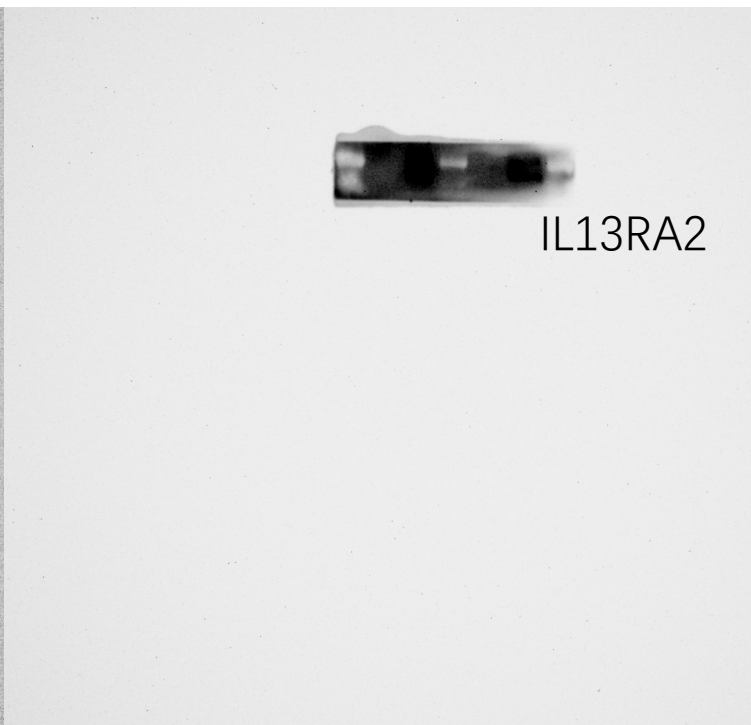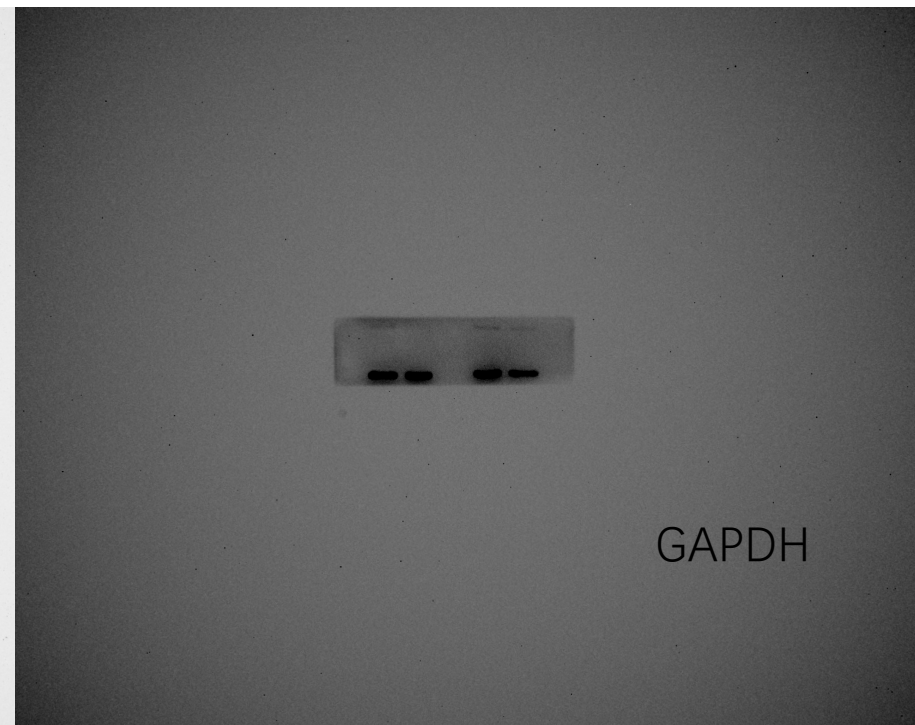

# Full unedited blots for figure 6F

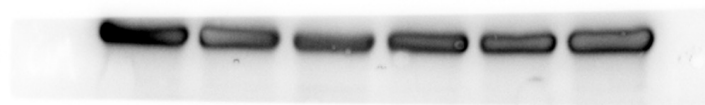

GAPDH

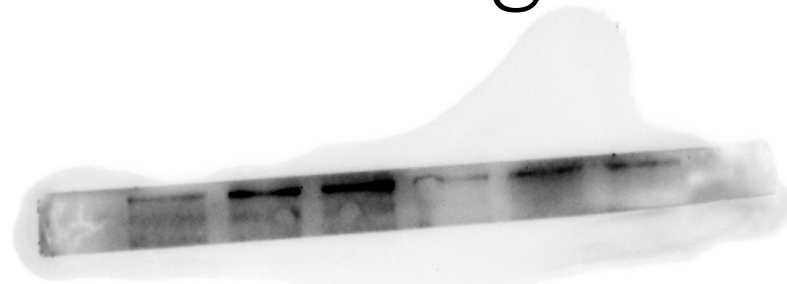

pSTAT6

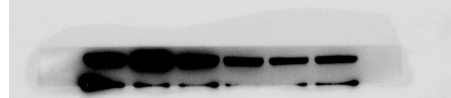

a-SMA

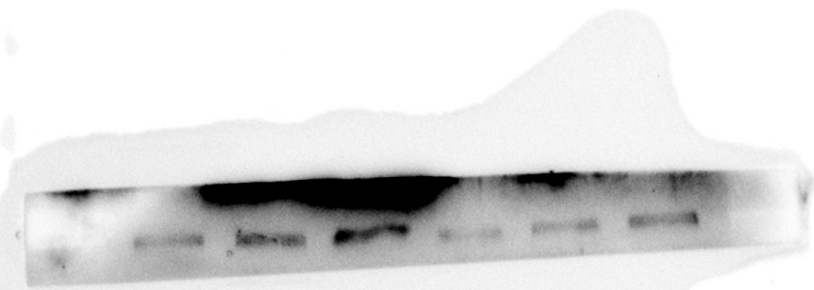

COL3A1

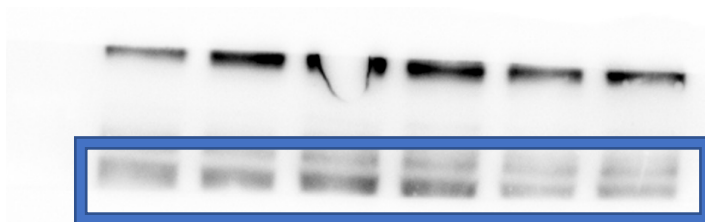

MMP2

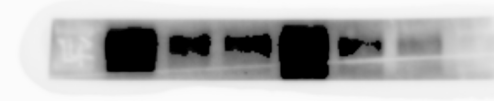

IL13RA2

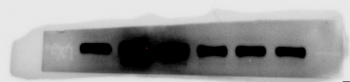

FN1

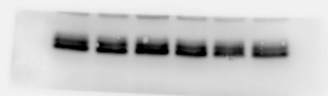

BCL2L1

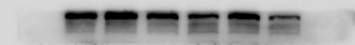

STAT6

# Full unedited blots for figure 7C

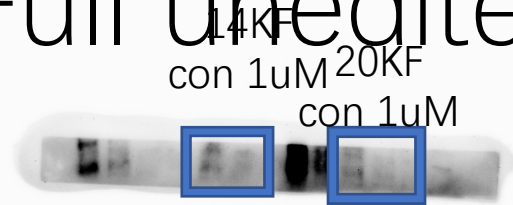

pSTAT6

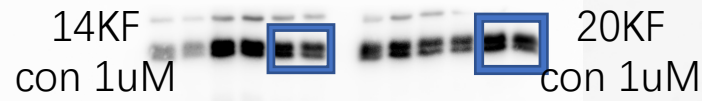

BCL2L1

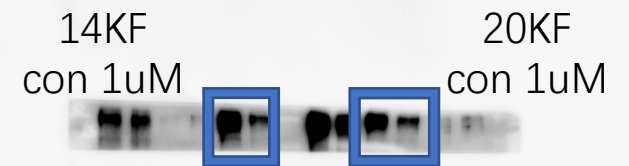

COL1A1

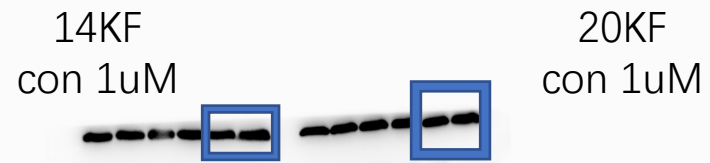

GAPDH

Loading control of BCL2L1

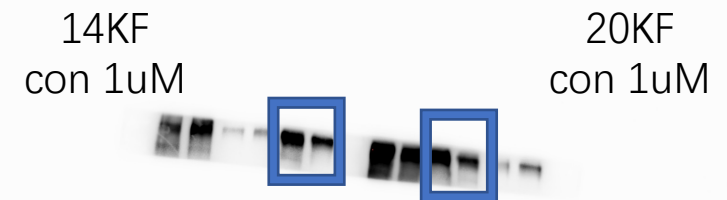

FN1

14KF  
con 1uM

20KF  
con 1uM

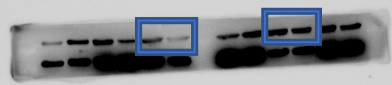

a-SMA

14KF  
con 1uM

20KF  
con 1uM

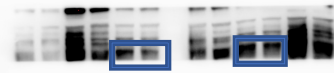

MMP2

14KF  
con 1uM

20KF  
con 1uM

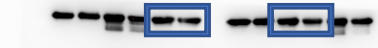

Vimentin

14KF  
con 1uM

20KF  
con 1uM

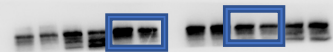

STAT6

14KF  
con 1uM

20KF  
con 1uM

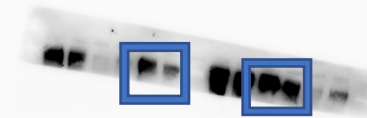

COL3A1

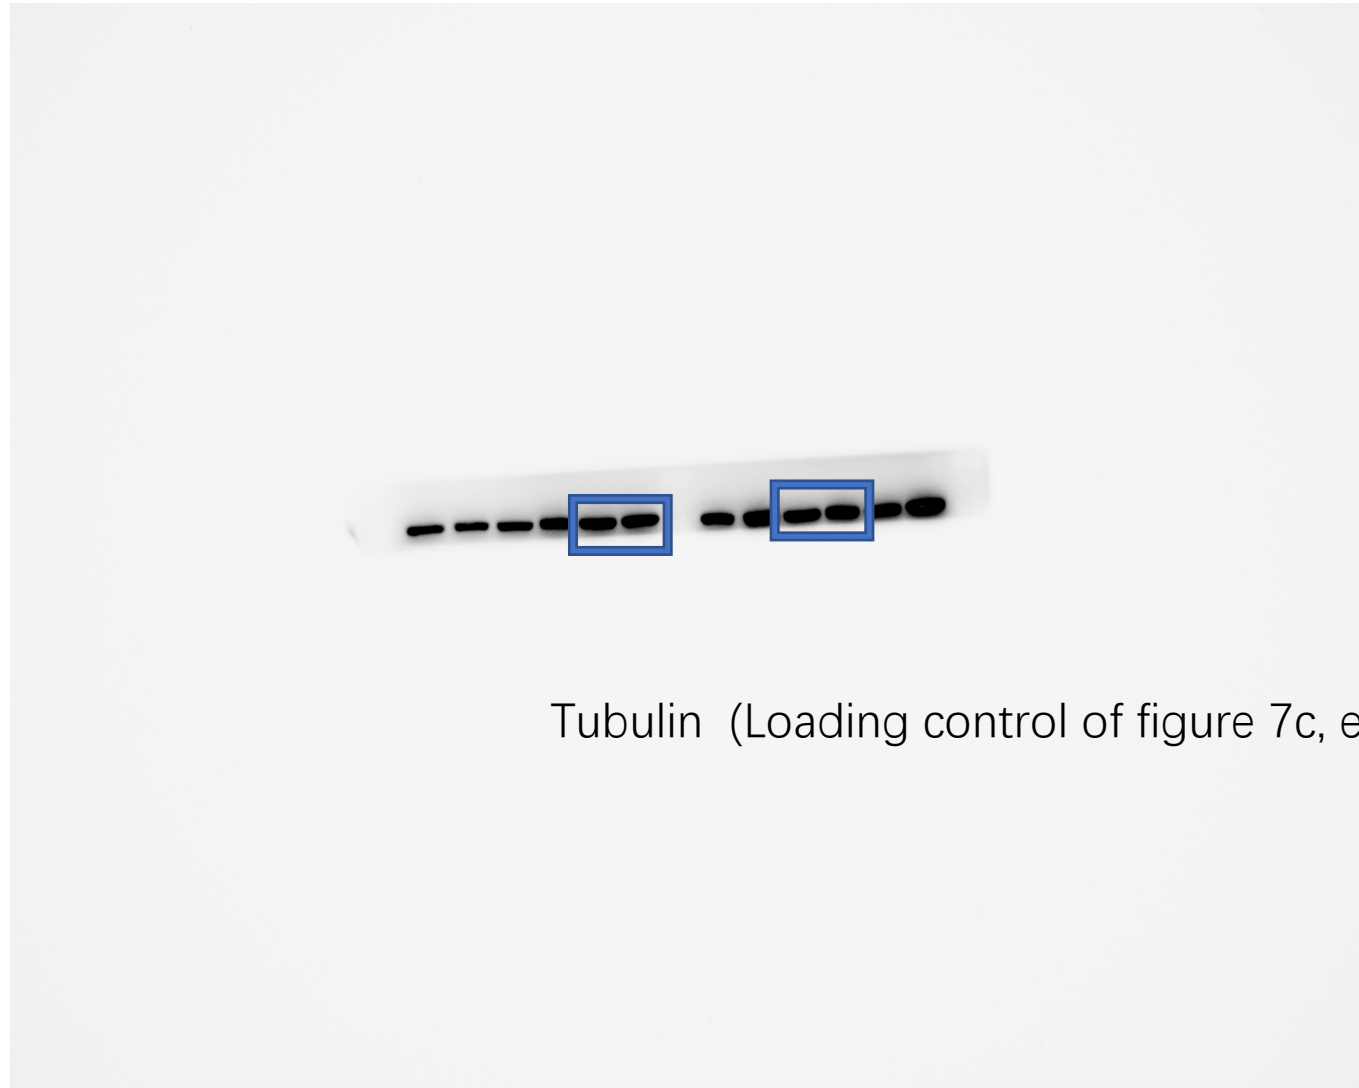

Tubulin (Loading control of figure 7c, except for BCL2L1)

# Full unedited blots for figure 7D

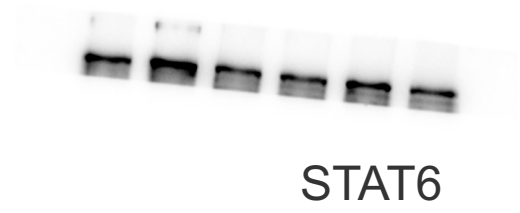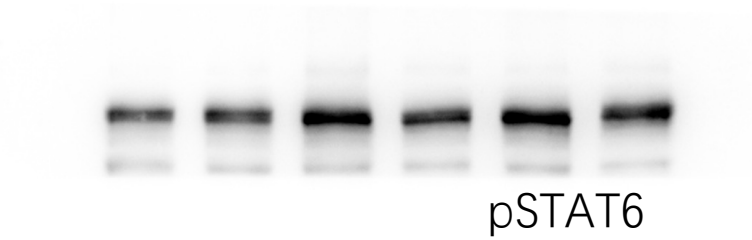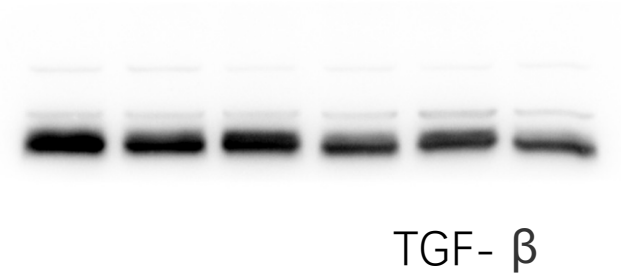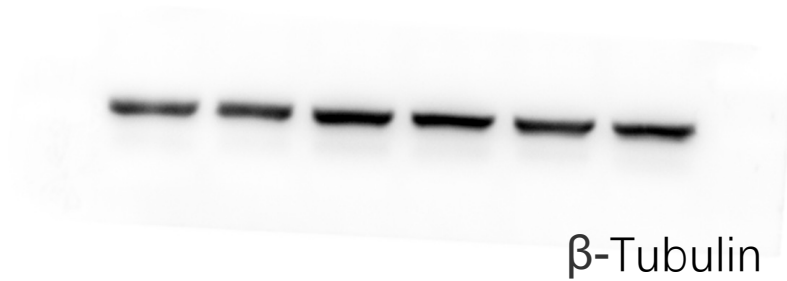



# Full unedited blots for figure s

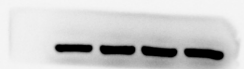

GAPDH

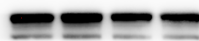

STAT6

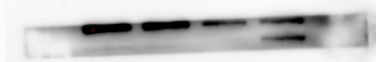

pSTAT6
